# Supplementary figures and images for: Dimethyl itaconate protects against fungal keratitis by activating the Nrf2/HO‐1 signaling pathway
Source: PubMed Central journal article supplement — Immunol Cell Biol. 2020 Feb 11;98(3):229–41. doi: 10.1111/imcb.12316 (PMC7065235; doi:10.1111/imcb.12316), 2020-02-11

**a**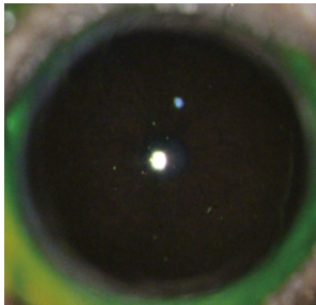**DI 3d****b**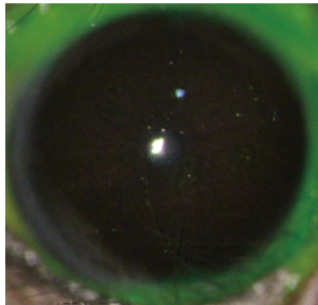**normal****c**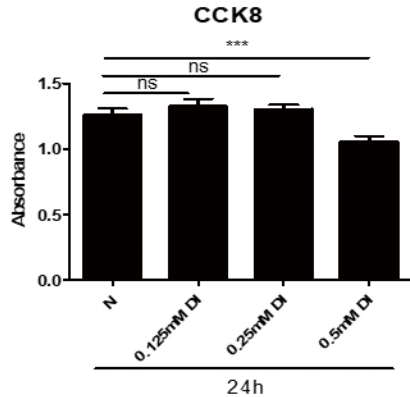

Supplement: IMCB-98-229-s001.pdf [file IMCB-98-229-s001.pdf]

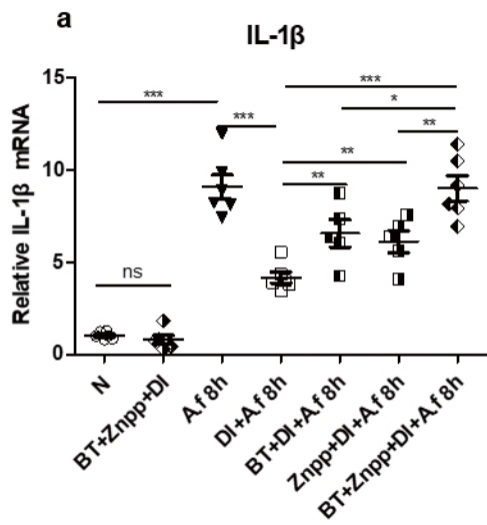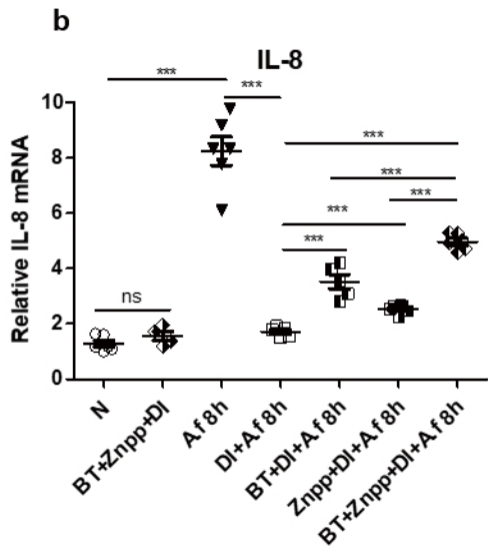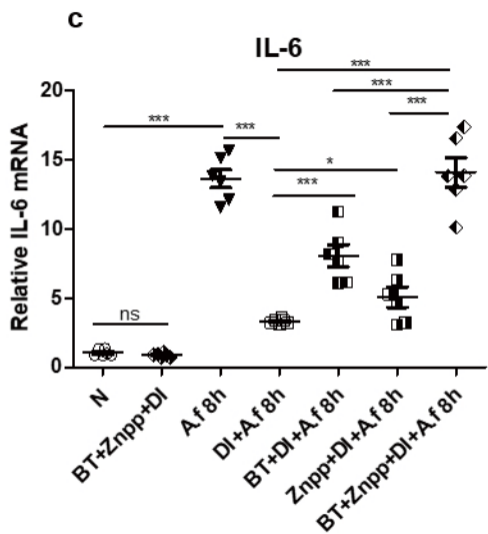

Supplement: IMCB-98-229-s002.pdf [file IMCB-98-229-s002.pdf]

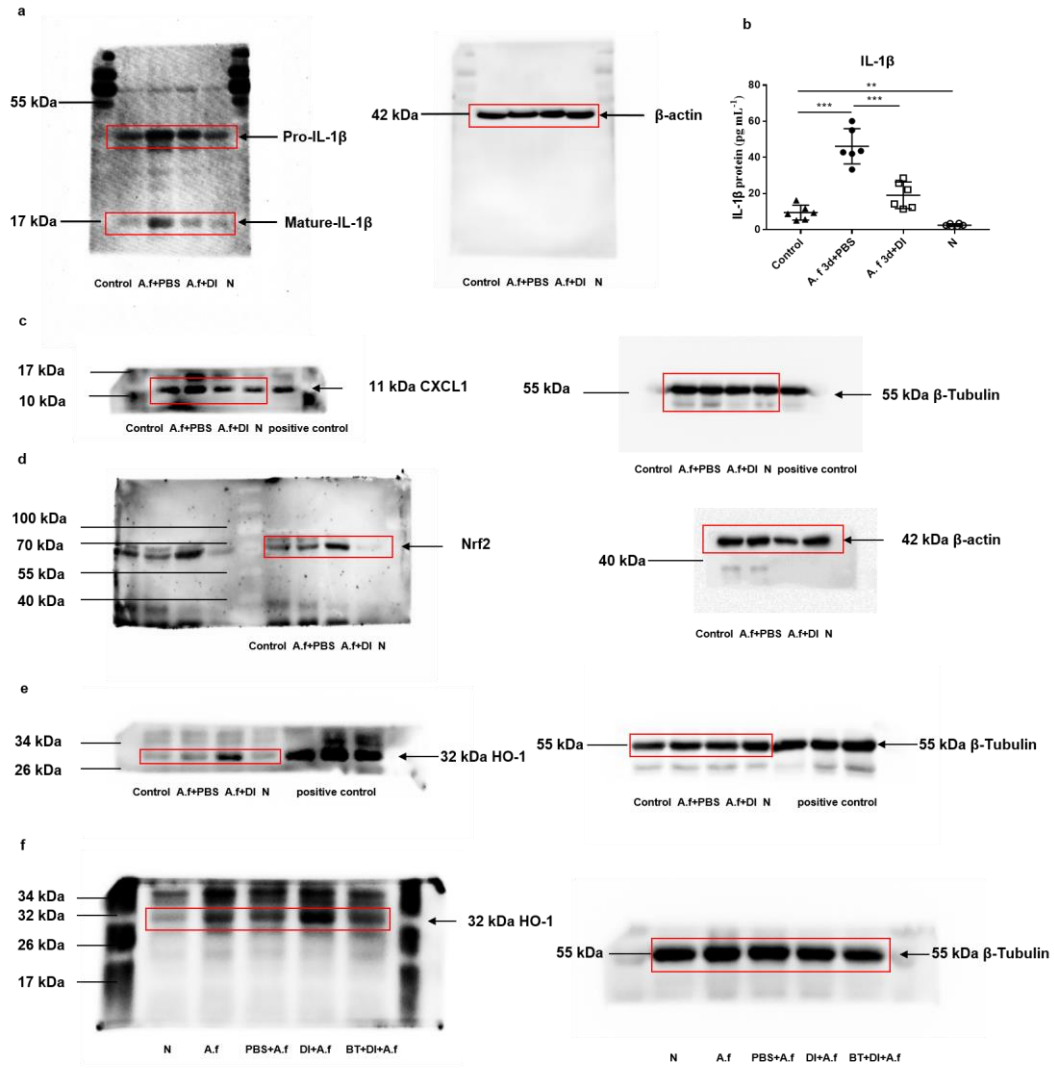

Supplement: IMCB-98-229-s003.pdf [file IMCB-98-229-s003.pdf]
